# Supplementary material for: A Novel Urease Inhibitor of Ruminal Microbiota Screened through Molecular Docking
Source: MDPI journal article supplement (doi:10.3390/ijms21176006), 2020-08-20

# Supplemental material

**Table 1.** Docking score and chemical formula of candidate compounds (top11-20).

| Rank | ChemDiv ID | Total Score | Structure                                                                            |
|------|------------|-------------|--------------------------------------------------------------------------------------|
| 11   | E734_1954  | 8.8859      | 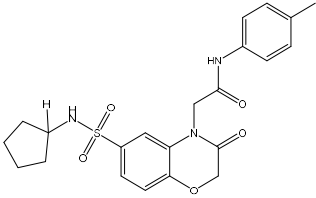   |
| 12   | F744_0156  | 8.8662      |    |
| 13   | D475_1699  | 8.8557      |   |
| 14   | L879_0020  | 8.8402      |  |
| 15   | S576_0333  | 8.8174      |  |
| 16   | E699_2409  | 8.8162      |  |

| Rank | ChemDiv ID | Total Score | Structure                                                                           |
|------|------------|-------------|-------------------------------------------------------------------------------------|
| 17   | S576_0590  | 8.8084      | 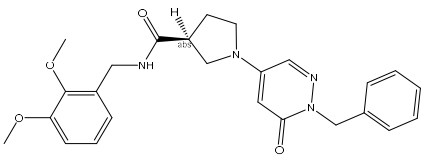  |
| 18   | F046_0010  | 8.7929      |   |
| 19   | F711_0534  | 8.7106      |   |
| 20   | G406_2430  | 8.7087      |  |

**Figure S1. The active site of ruminal metagenomic urease homology model.**

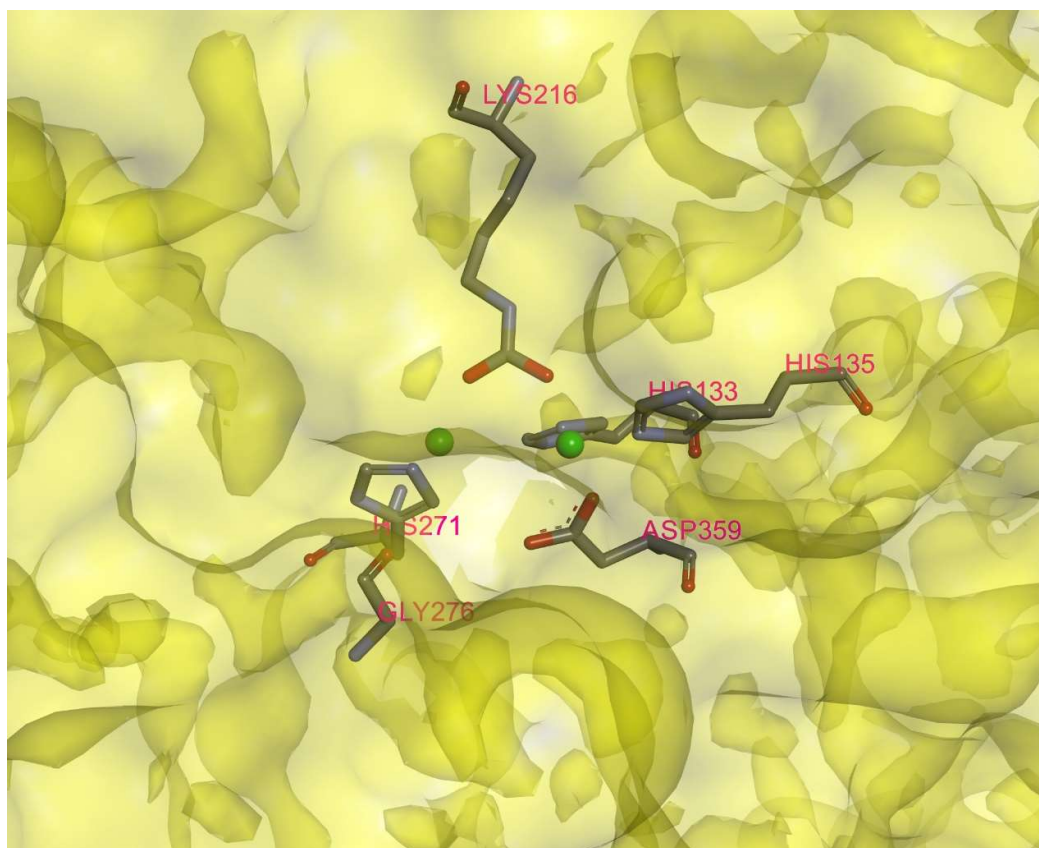

The active site of ruminal metagenomic urease homology model consists of two nickel ions (green spheres), bridged by Lys216, with one nickel binds to His 133 and another nickel bonds to His 245. His 271 and Asp 359 also coordinates to one of the nickel ions.

**Figure S2. Binding mode of compounds 6238-0047 with the active site of ruminal metagenomic urease homology model.**

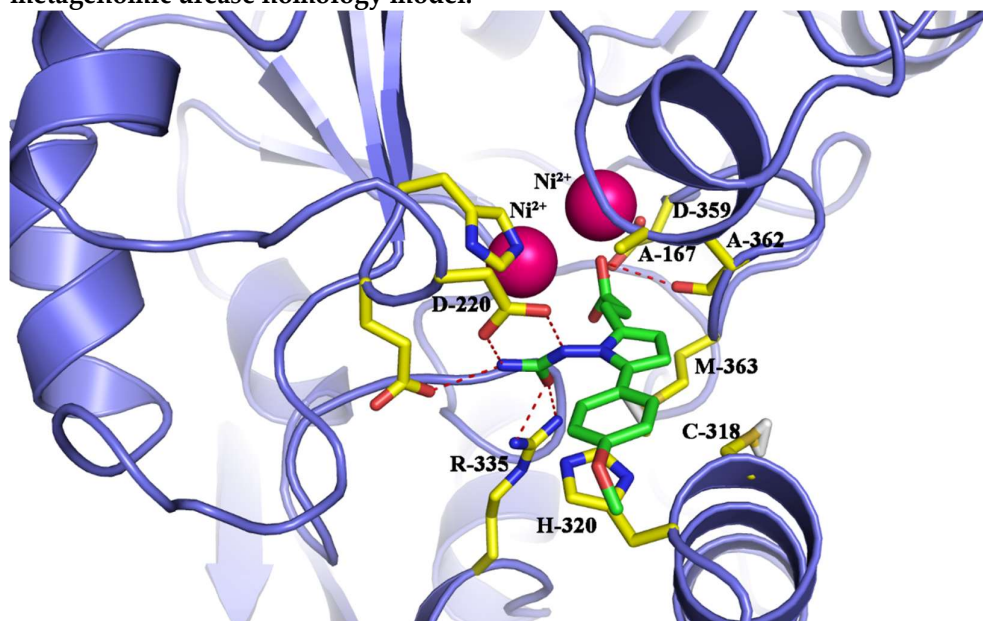

Binding mode of compounds 6238-0047 with the active site of ruminal metagenomic urease homology model was revealed by molecular docking. The active site is colored in light purple color while its critical amino acid residues are represented by yellow stick. The compound 6238-0047 is depicted in green color, while their hydrogen-bond-related functional groups are painted in red and blue respectively. The red dotted lines indicate where the hydrogen bonds formed. Two nickel atoms are demonstrated in rose color.

## Detailed parameters for virtual screening

Virtual screening is usually realized by two methods:

- Ligand-based methods, which rely on the similarity between the compounds of interest and the known active compounds. This method often resort to a technology named Pharmacophore.
- Receptor-based methods, which rely on the complementarity of the compounds of interest with the binding site of the target protein. This methods usually based on a technology named Molecular docking.

In our study, we employed molecular docking technology to do virtual screening against ChemDiv compound database. This means that parameters and procedures for virtual screening are also for the molecular docking.

1. Parameters for compound filtering to obtain compounds with drug-like property.

- ①molecular weight <700
- ②ClogP -4 ~ 6
- ③Number of H-bond donors <6
- ④Number of H bond acceptors <15
- ⑤Number of rotatable bonds <10

Compound Filtering

Input source: Database Input Spreadsheet: None Add exclusion columns: ☐

Database or file to filter: for the Subset: None

Put excluded compounds in: File Type: SLN File Nested: ☐

Put passing compounds in: File Type: SLN File Nested: ☐

Range for Passing Filter

|                                                        | Minimum | Maximum |
|--------------------------------------------------------|---------|---------|
| <input type="checkbox"/> - Num Atoms                   | 5       | 80      |
| <input type="checkbox"/> - Num Bonds                   | 5       | 80      |
| <input type="checkbox"/> - Num Rings                   | 0       | 5       |
| <input type="checkbox"/> - Filter by SLN               | 1       | 5       |
| <input checked="" type="checkbox"/> - Molecular Wt     | 0       | 700     |
| <input type="checkbox"/> - Num Chiral Atoms            | 0       | 5       |
| <input checked="" type="checkbox"/> - Num Rot Bonds    | 0       | 11      |
| <input checked="" type="checkbox"/> - ClogP            | -4      | 6       |
| <input type="checkbox"/> - CMR                         | 0       | 12      |
| <input checked="" type="checkbox"/> - Num HB Donors    | 0       | 6       |
| <input checked="" type="checkbox"/> - Num HB Acceptors | 0       | 15      |
| <input type="checkbox"/> - Num Hydrophobes             | 0       | 5       |

SLN to Filter on: Chirality Perception: potential

Maximum ClogP Error: Maximum CMR Error:

Exclusions

☐ Exclude Metals ☐ Exclude Isotopes ☐ Exclude Mixtures ☐ Require 3D Coords

Exclude the groups in this file:

Read Filter Settings... Save Filter Settings...

OK Reset Cancel Help

2. Parameters for the first round of virtual screening

The parameters used for the selection of 8753 compounds out of 0.87 million in the first round of virtual screening were listed as follows:

- ①“per-dock minimization” and “post-dock minimization” were selected.
- ②“max conformations per fragment” was set to 20.
- ③“max number of rotatable bonds per molecule” was set to 100.
- ④“maximum number of poses per ligand” was set to 10.

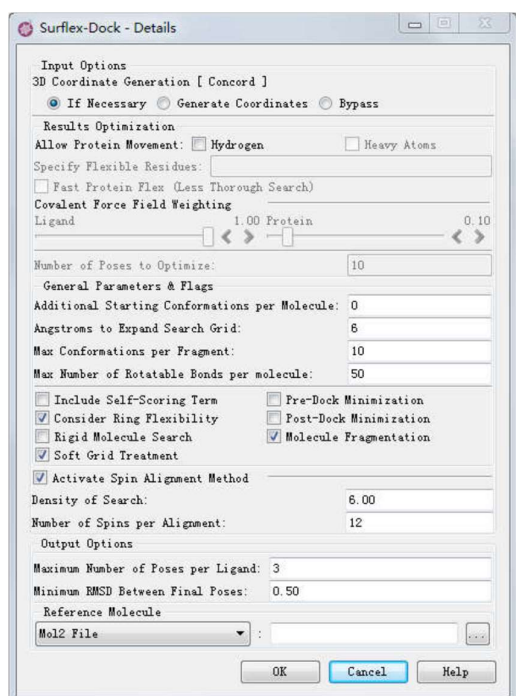

### 3. Parameters for the second round of virtual screening

The parameters used for the selection of 20 candidate compounds out of 8753 compounds in the second round of virtual screening were listed as follows:

- ① “per-dock minimization” and “post-dock minimization” were selected.
- ② “max conformations per fragment” was set to 20.
- ③ “max number of rotatable bonds per molecule” was set to 100.
- ④ “maximum number of poses per ligand” was set to 10.

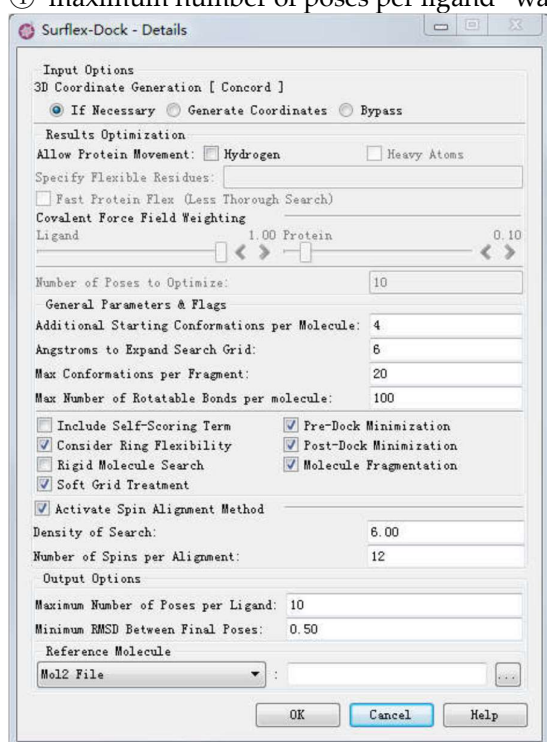

Supplement: s1 [file s1]
